# Supplementary material for: Intertwined Weyl phases emergent from higher-order topology and unconventional Weyl fermions via crystalline symmetry
Source: Springer Nature journal article supplement (doi:10.1038/s41535-022-00422-0), 2022-01-27
Supplement: 41535_2022_422_MOESM1_ESM.pdf [file 41535_2022_422_MOESM1_ESM.pdf]

# Supplementary Information for “Intertwined Weyl phases emergent from higher-order topology and unconventional Weyl fermions via crystalline symmetry”

W. B. Rui,<sup>1</sup> Zhen Zheng,<sup>1</sup> Moritz M. Hirschmann,<sup>2</sup> Song-Bo Zhang,<sup>3</sup> Chenjie Wang,<sup>1</sup> and Z. D. Wang<sup>1</sup>

<sup>1</sup>*Department of Physics and HKU-UCAS Joint Institute for Theoretical and Computational Physics at Hong Kong,  
The University of Hong Kong, Pokfulam Road, Hong Kong, China*

<sup>2</sup>*Max Planck Institute for Solid State Research, Heisenbergstrasse 1, D-70569 Stuttgart, Germany*

<sup>3</sup>*Institute for Theoretical Physics and Astrophysics,  
University of Würzburg, D-97074 Würzburg, Germany*

In this Supplementary Information file, we discuss the symmetries in intertwined double-Weyl phases (Supplementary Note 1), derive the effective boundary Hamiltonian (Supplementary Note 2), explain the experimental setup for realizing the intertwined double-Weyl phases (Supplementary Note 3), and briefly discuss the generalization to intertwined triple-Weyl phases (Supplementary Note 4).

## Supplementary Note 1. SYMMETRIES IN INTERTWINED DOUBLE-WEYL PHASES

We start with Eq. (6) of the main text, which can be written in the following form,

$$H(\mathbf{k}) = H_0(\mathbf{k}) + m\tau_1\sigma_1, \quad (1)$$

where  $H_0(\mathbf{k})$  describes a normal double-Weyl semimetal,

$$H_0(\mathbf{k}) = 2A(\cos k_y - \cos k_x)\tau_3\sigma_1 + 2A \sin k_x \sin k_y \tau_3\sigma_2 + M(\mathbf{k})\tau_3\sigma_3 + \epsilon\tau_0\sigma_3, \quad (2)$$

with  $M(\mathbf{k}) = M_0 - 2t(\cos k_x + \cos k_y + \cos k_z)$ .

In order to generate Weyl points, time-reversal symmetry ( $\mathcal{T}$ ) has been broken by the introduction of a term  $\epsilon$ , and thus,

$$\mathcal{T}H_0(k_x, k_y, k_z)\mathcal{T}^{-1} \neq H_0(-k_x, -k_y, -k_z), \quad \mathcal{T} = \tau_2\sigma_2\mathcal{K}. \quad (3)$$

Here  $\mathcal{K}$  is the complex conjugation operator. The system described by the above Hamiltonian is invariant under inversion symmetry ( $\mathcal{I}$ ), and four-fold rotation symmetry ( $\mathcal{C}_4$ ). The symmetry relations are given by,

$$\mathcal{I}H_0(k_x, k_y, k_z)\mathcal{I}^{-1} = H_0(-k_x, -k_y, -k_z), \quad \mathcal{I} = \tau_0\sigma_0, \quad (4)$$

$$\hat{\mathcal{C}}_4 H_0(k_x, k_y, k_z)\hat{\mathcal{C}}_4^{-1} = H_0(k_y, -k_x, k_z), \quad \hat{\mathcal{C}}_4 = \tau_3\sigma_3. \quad (5)$$

Since the Weyl points are located on the  $k_z$  axis, we can do a series expansion around  $(k_x, k_y) = (0, 0)$ , i.e.,  $\sin k_{x/y} \rightarrow k_{x/y}$  and  $\cos k_{x/y} \rightarrow 1 - k_{x/y}^2/2$ . The obtained continuum model from Eq. (2) is written as

$$H_0(k_x, k_y, k_z) = A(k_x^2 - k_y^2)\tau_3\sigma_1 + 2Ak_x k_y \tau_3\sigma_2 + (M + tk_x^2 + tk_y^2 - 2t \cos k_z)\tau_3\sigma_3 + \epsilon\tau_0\sigma_3, \quad (6)$$

where  $M = M_0 - 4t$ . Using the polar coordinates  $k_x = k \cos \theta$ ,  $k_y = k \sin \theta$ , it becomes

$$H_0(k, \theta, k_z) = Ak^2 e^{+2i\theta} \tau_3\sigma_- + Ak^2 e^{-2i\theta} \tau_3\sigma_+ + (M + tk^2 - 2t \cos k_z)\tau_3\sigma_3 + \epsilon\tau_0\sigma_3. \quad (7)$$

Under the fourfold rotation operation about the  $z$  axis, the Hamiltonian shall satisfy [1]

$$\hat{\mathcal{C}}_4 H_0(k, \theta, k_z)\hat{\mathcal{C}}_4^{-1} = H_0(k, R_4\theta, k_z), \quad (8)$$

where  $R_4\theta = \theta + \pi/2$ . Together with Eq. (5), the double-Weyl points are stabilized by the fourfold rotation symmetry.

## Supplementary Note 2. EFFECTIVE BOUNDARY HAMILTONIAN

In this Supplementary Note, we derive the effective boundary Hamiltonian in the direction defined by  $\theta = \arctan(k_y/k_x)$  in the  $k_x k_y$ -plane at a given position on the  $k_z$  axis. To calculate the boundary states along any

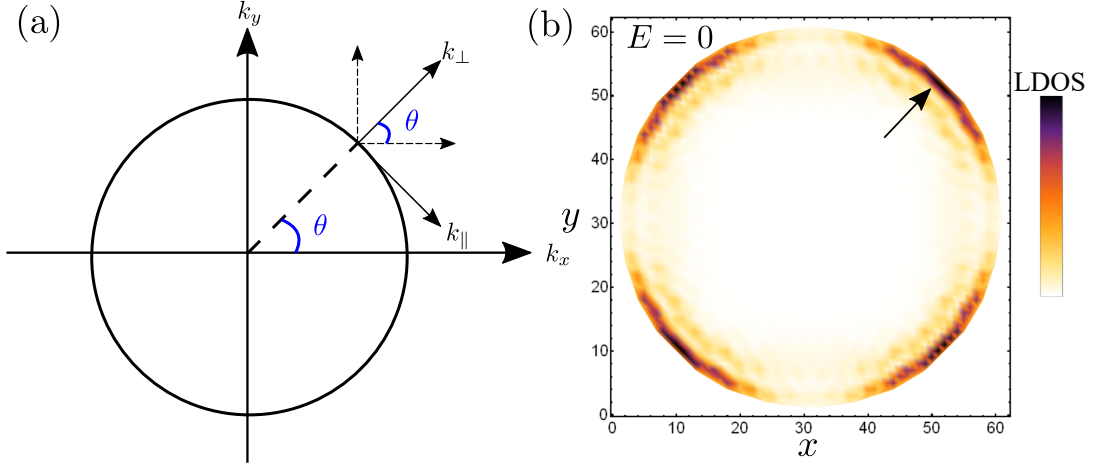

Supplementary Figure 1. (a) Relation between  $(k_x, k_y)$  and  $(k_{\parallel}, k_{\perp})$  at a given angle  $\theta$  in the  $k_x k_y$ -plane [see Fig. 2 (a) in the main text]. The coordinate transformation allows us to calculate the boundary states at any  $\theta$  at a given position on the  $k_z$  axis. (b) Local density of states at zero energy for  $k_z = 0$  on a disk geometry with  $x$  and  $y$  finite, where the higher-order topology manifests itself as the corner modes, as indicated by the black arrow.

direction, as shown in Supplementary Figure 1 (a), we first transform the coordinates from  $(k_x, k_y)$  to  $(k_{\parallel}, k_{\perp})$ . The relation between  $(k_{\parallel}, k_{\perp})$  and  $(k_x, k_y)$  is given by

$$\begin{pmatrix} k_x \\ k_y \end{pmatrix} = \begin{pmatrix} \sin \theta & \cos \theta \\ -\cos \theta & \sin \theta \end{pmatrix} \begin{pmatrix} k_{\parallel} \\ k_{\perp} \end{pmatrix}. \quad (9)$$

After the coordinate transformation, the resulting Hamiltonian (without higher-order term  $m\tau_1\sigma_1$ ) from Eq. (6) reads

$$H_0(k_{\parallel}, k_{\perp}, k_z) = \begin{pmatrix} \Delta_u + tk_{\perp}^2 & -e^{-2i\theta} A(k_{\parallel} - ik_{\perp})^2 & 0 & 0 \\ -e^{+2i\theta} A(k_{\parallel} + ik_{\perp})^2 & -(\Delta_u + tk_{\perp}^2) & 0 & 0 \\ 0 & 0 & -(\Delta_d + tk_{\perp}^2) & e^{-2i\theta} A(k_{\parallel} - ik_{\perp})^2 \\ 0 & 0 & e^{+2i\theta} A(k_{\parallel} + ik_{\perp})^2 & (\Delta_d + tk_{\perp}^2) \end{pmatrix}, \quad (10)$$

where  $\Delta_u = M + tk_{\parallel}^2 - 2t \cos k_z + \epsilon$  and  $\Delta_d = M + tk_{\parallel}^2 - 2t \cos k_z - \epsilon$ . The above Hamiltonian is in a block-diagonal form, which enables us to investigate each block separately. First, we focus on the upper block in Eq. (10), which reads

$$h_u(\mathbf{k}) = \begin{pmatrix} \Delta_u + tk_{\perp}^2 & -e^{-2i\theta} A(k_{\parallel} - ik_{\perp})^2 \\ -e^{+2i\theta} A(k_{\parallel} + ik_{\perp})^2 & -(\Delta_u + tk_{\perp}^2) \end{pmatrix}. \quad (11)$$

Suppose we have a semi-infinite system in the half plane  $x_{\perp} \leq 0$  with open boundary conditions and with translational symmetry along the  $\hat{x}_{\parallel}$  and  $\hat{z}$  directions.  $k_{\parallel}$  and  $k_z$  are still good quantum numbers but  $k_{\perp}$  is replaced by  $k_{\perp} = -i\partial_{x_{\perp}}$  in the Hamiltonian. We can assume a trial wavefunction for each set of  $k_{\parallel}$  and  $k_z$  as

$$\psi_{\lambda} = e^{ik_{\parallel}x_{\parallel} + ik_z z} \begin{bmatrix} \psi_1 \\ \psi_2 \end{bmatrix} e^{\lambda x_{\perp}}. \quad (12)$$

The corresponding Dirac equation reads ( $k_{\perp} \rightarrow -i\lambda$ )

$$\begin{pmatrix} \Delta_u - t\lambda^2 & -e^{-2i\theta} A(k_{\parallel} - \lambda)^2 \\ -e^{+2i\theta} A(k_{\parallel} + \lambda)^2 & -(\Delta_u - t\lambda^2) \end{pmatrix} \begin{pmatrix} \psi_1 \\ \psi_2 \end{pmatrix} = E \begin{pmatrix} \psi_1 \\ \psi_2 \end{pmatrix}. \quad (13)$$

The secular equation for the eigenenergies can be calculated as

$$\det |h_u(k_{\parallel}, -i\lambda, k_z) - E| = 0. \quad (14)$$

The equation reads explicitly as

$$(t^2 + A^2)\lambda^4 - 2(t\Delta_u + A^2k_{\parallel}^2)\lambda^2 + A^2k_{\parallel}^4 + \Delta_u^2 - E^2 = 0. \quad (15)$$

We can obtain the solution for  $\lambda$  as

$$\lambda_{\alpha}^2 = \frac{1}{(t^2 + A^2)} \left[ (t\Delta_u + A^2k_{\parallel}^2) + (-1)^{\alpha} \sqrt{(t^2 + A^2)E^2 - A^2(\Delta_u - tk_{\parallel}^2)^2} \right]. \quad (16)$$

Here  $\alpha = 1, 2$ . The corresponding eigenvectors are

$$\psi_{\lambda_{\alpha}} = \begin{pmatrix} e^{-2i\theta} A(k_{\parallel} - \lambda_{\alpha})^2 \\ (\Delta_u - t\lambda_{\alpha}^2) - E \end{pmatrix}, \quad \text{or} \quad \psi_{\lambda_{\alpha}} = \begin{pmatrix} (\Delta_u - t\lambda_{\alpha}^2) + E \\ -e^{2i\theta} A(k_{\parallel} + \lambda_{\alpha})^2 \end{pmatrix}. \quad (17)$$

Thus, a general wavefunction can be expanded in terms of these eigenvectors.

Using the boundary condition at  $x_{\perp} \rightarrow \infty$ , it is required that  $\text{Re}\lambda_{\alpha} > 0$ . For the the boundary condition at  $x_{\perp} \rightarrow 0$ , by the following relation  $|\psi_{\lambda_1} - \psi_{\lambda_2}| = 0$ , we get

$$(2k_{\parallel} - \lambda_1 - \lambda_2)E = -(tk_{\parallel}^2 + \Delta_u)(\lambda_1 + \lambda_2) + 2k_{\parallel}(\Delta_u + t\lambda_1\lambda_2), \quad (18)$$

$$(2k_{\parallel} + \lambda_1 + \lambda_2)E = -(tk_{\parallel}^2 + \Delta_u)(\lambda_1 + \lambda_2) - 2k_{\parallel}(\Delta_u + t\lambda_1\lambda_2). \quad (19)$$

Note that we have  $\lambda_1^2 + \lambda_2^2 = (\lambda_1 + \lambda_2)^2 - 2\lambda_1\lambda_2 = 2(t\Delta_u + A^2k_{\parallel}^2)/(t^2 + A^2)$  from the expression of  $\lambda_{\alpha}^2$  in Eq. (16). Together with the above equation, we obtain

$$\lambda_1 = \frac{1}{\sqrt{t^2 + A^2}} (Ak_{\parallel} - \sqrt{t\Delta_u}), \quad (20)$$

$$\lambda_2 = \frac{1}{\sqrt{t^2 + A^2}} (Ak_{\parallel} + \sqrt{t\Delta_u}). \quad (21)$$

Plugging  $\lambda_{\alpha}$  into the relation of Eqs. (18) and (19), the eigenenergy is obtained as

$$E = -\frac{A}{\sqrt{t^2 + A^2}} (tk_{\parallel}^2 + \Delta_u) = -\frac{A}{\sqrt{t^2 + A^2}} (2tk_{\parallel}^2 + M - 2t \cos k_z + \epsilon). \quad (22)$$

The eigenstates are obtained as

$$\psi_u = \begin{pmatrix} e^{-2i\theta} \\ \frac{A}{t}(\sqrt{t^2 + A^2} + A) \end{pmatrix}. \quad (23)$$

In the following, we take  $t = A = 1$ , in accordance with the parameters in our numerical calculation. It is required that  $\text{Re}\lambda_{\alpha} > 0$  in order for the wavefunction to decay exponentially away from the boundary. Thus,

$$\lambda_1\lambda_2 = \frac{1}{t^2 + A^2} (A^2k_{\parallel}^2 - t\Delta_u) > 0. \quad (24)$$

The corresponding  $k_z$  shall satisfy  $-\arccos \frac{M+\epsilon}{2} < k_z < \arccos \frac{M+\epsilon}{2}$ , which lies approximately between the two Weyl points, i.e.,  $k_z \in (-k_{w2}, k_{w2})$  in Fig. 2 (a) in the main text. Returning to the full  $4 \times 4$  Hamiltonian, the eigenfunctions for the boundary states in this region are in the form of

$$\psi_u \propto \begin{pmatrix} e^{-2i\theta} \\ \sqrt{2} + 1 \\ 0 \\ 0 \end{pmatrix}, \text{ for } k_z \in (-k_{w2}, k_{w2}). \quad (25)$$

Note that the contributions from spatial part are neglected here, as they do not affect the main results.

A similar procedure can be obtained for the lower block of

$$h_d(\mathbf{k}) = \begin{pmatrix} -(\Delta_d + tk_{\perp}^2) & e^{-2i\theta} A(k_{\parallel} - ik_{\perp})^2 \\ e^{+2i\theta} A(k_{\parallel} + ik_{\perp})^2 & (\Delta_d + tk_{\perp}^2) \end{pmatrix}. \quad (26)$$

The wavefunction is obtained as

$$\psi_d \propto \begin{pmatrix} 0 \\ 0 \\ e^{-2i\theta} \\ \sqrt{2} + 1 \end{pmatrix}, \text{ for } k_z \in (-k_{w1}, k_{w1}). \quad (27)$$

The boundary states in Eqs. (25) and (27) are both valid in the region of  $(-k_{w1}, k_{w1}) \cap (-k_{w2}, k_{w2})$ . For the chosen parameters in numerical calculations,  $k_{w2} < k_{w1}$ , and thus,  $(-k_{w1}, k_{w1}) \cap (-k_{w2}, k_{w2}) = (-k_{w2}, k_{w2})$ . In this region, we can project the system to the boundary with the normalized eigenvectors, and obtain the following effective boundary Hamiltonian,

$$h_{\text{eff}} = -\frac{1}{\sqrt{2}}[(2k_{\parallel}^2 - k_c^2)\sigma_3 - m \cos(2\theta)\sigma_1], \text{ for } k_z \in (-k_{w2}, k_{w2}), \quad (28)$$

up to a constant term  $-1/\sqrt{2}\varepsilon\sigma_0$ , where  $k_c^2 = 2t \cos k_z - M$ .

We can also project the fourfold rotation symmetry operator to the boundary, and obtain  $\hat{c}_4 = \sigma_3$ . The higher-order term satisfies this symmetry, i.e.,  $\hat{c}_4 [m \cos(2\theta)\sigma_1] \hat{c}_4^{-1} = m \cos[2(\theta + \pi/2)]\sigma_1$ . Note that the rotation symmetry does not allow constant terms that are proportional to  $\sigma_2$  after projection. The symmetry enforces the following condition at the boundary

$$m \cos[2(\theta + \pi/2)] = -m \cos(2\theta). \quad (29)$$

This implies that there must be gapless states when going from  $\theta$  to  $\theta + \pi/2$ , resulting in higher-order topology. In Fig. 1 (b), the corner states are shown by calculating the local density of states at zero energy, in the higher-order topology region at  $k_z = 0 \in (-k_{w2}, k_{w2})$ . These corner states leads to hinge Fermi arcs as shown in Fig. 1(b) in the main text.

### Supplementary Note 3. PROPOSAL FOR EXPERIMENTAL REALIZATION

We consider the atomic Fermi gas trapped in a 2D bilayer optical lattice, in which the layer index is denoted as  $\lambda = 1, 2$ . The system is governed by the following Hamiltonian,

$$H = H_{\text{hop}} + H_{\text{soc}} + H_{\text{os}}. \quad (30)$$

The first term  $H_{\text{hop}}$  describes the nearest-neighbor hopping,

$$H_{\text{hop}} = -\sum_{\lambda} \sum_j \sum_{\eta=x,y} \sum_{\nu=\uparrow\downarrow} t c_{j\nu\lambda}^{\dagger} c_{j+e_{\eta},\nu,\lambda} - \sum_j \sum_{\nu} t_z c_{j\nu 1}^{\dagger} c_{j\nu 2} + H.c. \quad (31)$$

where  $c_{j\nu\lambda}$  denotes the annihilation operator of the atom with spin- $\nu$  on  $j$ -th site of the  $\lambda$ -th layer, and  $e_{x,y,z}$  denotes the unit vector.

The second term  $H_{\text{soc}}$  describes the spin-orbit coupling. We engineer this term by coupling opposite spins via laser fields of three modes:  $M_1(\mathbf{r}) = iM_1 \sin(k_L x) \sin(k_L y)$ ,  $M_2(\mathbf{r}) = M_2 \cos(k_L x) \cos(\mathcal{N}k_L y) \cos(k_L z)$ , and  $M'_2(\mathbf{r}) = -M_2 \cos(\mathcal{N}k_L x) \cos(k_L y) \cos(k_L z)$ . Here  $k_L = \pi/d$  and  $d$  denotes the lattice constant.  $\mathcal{N}$  is an arbitrary odd number greater than 1 (i.e.  $\mathcal{N} = 3, 5, 7, \dots$ ). Due to the odd parity of  $M_1(\mathbf{r})$  in the  $xy$ -plane for either  $x$  and  $y$ , the on-site and nearest-neighbor (NN) terms vanish, leaving the next-NN terms dominant [2]:

$$H_{\text{soc}}^{(1)} = \sum_{\lambda} \sum_j \sum_{\nu\nu'} (-1)^{j_x+j_y} A_1 [\sigma_2]_{\nu\nu'} (c_{j\nu\lambda}^{\dagger} c_{j+e_x-e_y,\nu',\lambda} - c_{j\nu\lambda}^{\dagger} c_{j+e_x+e_y,\nu',\lambda}) + H.c. \quad (32)$$

where  $iA_1 = \int M_1(\mathbf{r}) W^*(\mathbf{r}) W(\mathbf{r} + de_x + de_y) d\mathbf{r}$ . The modes  $M_2(\mathbf{r})$  and  $M'_2(\mathbf{r})$  can introduce both the on-site and NN terms. However, due to the crystal symmetry, the Wannier wave function of atoms on each site is isotropic in

the  $x$ ,  $y$ , and  $z$  directions. Since there exists difference in sign between  $M_2(\mathbf{r})$  and  $M'_2(\mathbf{r})$ , both the on-site and the  $z$ -directional NN terms cancel out, leaving the NN terms in the  $xy$ -plane dominant:

$$H_{\text{soc}}^{(2)} = \sum_{\lambda} \sum_j \sum_{\nu\nu'} (-1)^\lambda (-1)^{j_x+j_y} A_2 [\sigma_1]_{\nu\nu'} [c_{j\nu\lambda}^\dagger c_{j+e_y,\nu',\lambda} - c_{j\nu\lambda}^\dagger c_{j+e_x,\nu',\lambda}] + H.c. \quad (33)$$

where we have denoted  $A_2 = \int [M_2(\mathbf{r}) - M'_2(\mathbf{r})] W^*(\mathbf{r}) W(\mathbf{r} + d\mathbf{e}_y) d\mathbf{r}$ . By combining Eqs. (32) and (33),  $H_{\text{soc}}$  is given as

$$H_{\text{soc}} = H_{\text{soc}}^{(1)} + H_{\text{soc}}^{(2)}. \quad (34)$$

For simplicity, we can tune  $2A_1 = A_2 = A$  in experiments.

The last term  $H_{\text{os}}$  describes the on-site energy,

$$H_{\text{os}} = \sum_{\lambda} \sum_j \sum_{\nu\nu'} \Gamma_{\lambda}(\phi) [\sigma_3]_{\nu\nu'} c_{j\nu\lambda}^\dagger c_{j\nu'\lambda}. \quad (35)$$

It can be engineered by the Zeeman split of hyperfine levels and assigned with a tunable cyclical parameter  $\phi$ ,

$$\Gamma_{\lambda}(\phi) = M_0 + (-1)^\lambda \epsilon - 2t \cos(\phi). \quad (36)$$

We make the following operator transformation which preserves the anti-commutation of fermionic operators,

$$c_{j\uparrow 1} \rightarrow c_{j\uparrow 1}, \quad c_{j\downarrow 1} \rightarrow (-1)^{j_x+j_y} c_{j\downarrow 1}, \quad c_{j\uparrow 2} \rightarrow c_{j\downarrow 2}, \quad c_{j\downarrow 2} \rightarrow (-1)^{j_x+j_y} c_{j\uparrow 2}. \quad (37)$$

In the base  $c = (c_{\uparrow 1}, c_{\downarrow 1}, c_{\uparrow 2}, c_{\downarrow 2})^T$ , Hamiltonian (30) is then rewritten as

$$H = \sum_j \left[ - \sum_{\eta=x,y} t\tau_3 \sigma_3 c_j^\dagger c_{j+e_\eta} + A\tau_3 \sigma_1 (c_j^\dagger c_{j+e_y} - c_j^\dagger c_{j+e_x}) + \frac{A}{2} \tau_3 \sigma_2 (c_j^\dagger c_{j+e_x-e_y} - c_j^\dagger c_{j+e_x+e_y}) + H.c. \right] \\ + \Gamma_{\lambda}(\phi) \tau_3 \sigma_3 c_j^\dagger c_j - t_z \tau_1 \sigma_1 c_j^\dagger c_j. \quad (38)$$

We remark that the higher-order topological term  $\tau_1 \sigma_1$  naturally originates from the hopping in the  $z$  direction. Hereafter, we denote  $-t_z \equiv m$  to be consistent with formulas in the main text.

Since  $\phi$  is manually controllable, we can treat it as an artificial dimension of the  $z$  axis under periodic boundary conditions along this direction. The 2D momentum space  $(k_x, k_y)$  is then mapped into a 3D parameterized space  $(k_x, k_y, \phi)$ . By transforming Eq. (38) into the momentum space, we can obtain the effective Hamiltonian that is identical to the model in the main text:

$$H(\mathbf{k}) = 2A[\cos(k_y d) - \cos(k_x d)] \tau_3 \sigma_1 + 2A \sin(k_x d) \sin(k_y d) \tau_3 \sigma_2 + M(\mathbf{k}) \tau_3 \sigma_3 + \epsilon \tau_0 \sigma_3 + m \tau_1 \sigma_1, \quad (39)$$

where  $M(\mathbf{k}) = M_0 - 2t \sum_{\eta=k_x, k_y, \phi} \cos(\eta d)$ .

We are interested in Fermi-arc topology on the surfaces that are parallel to  $\phi$  (i.e.,  $k_z$ ) direction. Using the time-of-flight images [3, 4], the Fermi arc surface states at a specific surface orientation may be determined, by measuring the density on boundaries of the atomic cloud parallel to the expansion direction. In order to process the measurement on a specific surface termination normal to the  $xy$ -plane, one can switch off the trap of atoms in one direction (at an angle  $\theta$  to the  $x$ -axis), while keeping the confinement in the relative perpendicular direction. This is practically feasible because the magneto-optic trap and the optical lattice trap are separately generated, and thus, this provides the possibility for artificially controlling the expansion direction in the  $xy$ -plane.

#### Supplementary Note 4. GENERALIZATION TO INTERTWINED TRIPLE-WEYL PHASES

The intertwined triple-Weyl phases could be constructed similarly to intertwined double-Weyl phases. By a straightforward generalization from the continuum model in Eq. (6), the low energy effective model for the intertwined triple-Weyl phases is

$$H_0(k_x, k_y, k_z) = Ak_x(k_x^2 - 3k_y^2) \tau_3 \sigma_1 + Ak_y(3k_x^2 - k_y^2) \tau_3 \sigma_2 + (M + tk_x^2 + tk_y^2 - 2t \cos k_z) \tau_3 \sigma_3 + \epsilon \tau_0 \sigma_3. \quad (40)$$

Time-reversal symmetry is broken by the term  $\epsilon \tau_0 \sigma_3$ , which can be seen by  $\mathcal{T} \epsilon \tau_0 \sigma_3 \mathcal{T}^{-1} = -\epsilon \tau_0 \sigma_3$ . Thus,

$$\mathcal{T} H_0(k_x, k_y, k_z) \mathcal{T}^{-1} \neq H_0(-k_x, -k_y, -k_z), \quad \mathcal{T} = \tau_1 \sigma_1 \mathcal{K}. \quad (41)$$

The inversion symmetry is still preserved,

$$\mathcal{I}H_0(k_x, k_y, k_z)\mathcal{I}^{-1} = H_0(-k_x, -k_y, -k_z), \mathcal{I} = \tau_3\sigma_3. \quad (42)$$

Using the substitution of  $k_x = k \cos \theta$ ,  $k_y = k \sin \theta$ , the above Hamiltonian becomes,

$$H_0(k, \theta, k_z) = Ak^3 e^{+3i\theta} \tau_3 \sigma_- + Ak^3 e^{-3i\theta} \tau_3 \sigma_+ + (M + tk^2 - 2t \cos k_z) \tau_3 \sigma_3 + \epsilon \tau_0 \sigma_3. \quad (43)$$

The Hamiltonian is protected by the sixfold rotation symmetry,

$$\hat{C}_6 H_0(k, \theta, k_z) \hat{C}_6^{-1} = H_0(k, R_6 \theta, k_z), \hat{C}_6 = \tau_3 \sigma_3 \text{ and } R_6 \theta = \theta + \frac{\pi}{3}. \quad (44)$$

We are interested in symmetry allowed terms that could generate higher-order topology. It is found that  $m\tau_1\sigma_1$  is again invariant under  $C_6$  symmetry as

$$\hat{C}_6 m\tau_1\sigma_1 \hat{C}_6^{-1} = m\tau_1\sigma_1. \quad (45)$$

Thus, the Hamiltonian for intertwined triple-Weyl phases could be constructed as

$$H(k_x, k_y, k_z) = Ak_x(k_x^2 - 3k_y^2)\tau_3\sigma_1 + Ak_y(3k_x^2 - k_y^2)\tau_3\sigma_2 + (M + tk_x^2 + tk_y^2 - 2t \cos k_z)\tau_3\sigma_3 + \epsilon\tau_0\sigma_3 + m\tau_1\sigma_1. \quad (46)$$

The local density of states on surface with different orientations are calculated in Figs. 1(g-i) in the main text.

- 
- [1] C. Fang, M. J. Gilbert, X. Dai, and B. A. Bernevig, [Phys. Rev. Lett. \*\*108\*\*, 266802 \(2012\)](#).
  - [2] X.-J. Liu, K. T. Law, and T. K. Ng, [Phys. Rev. Lett. \*\*112\*\*, 086401 \(2014\)](#).
  - [3] D.-W. Zhang, Y.-Q. Zhu, Y. X. Zhao, H. Yan, and S.-L. Zhu, [Adv. Phys. \*\*67\*\*, 253 \(2018\)](#).
  - [4] L. Wang, A. A. Soluyanov, and M. Troyer, [Phys. Rev. Lett. \*\*110\*\*, 166802 \(2013\)](#).
